# Supplementary material for: Theory of polymer-electrolyte-composite electroactuator sensors with flat or volume-filling electrodes
Source: Royal Society of Chemistry journal article supplement (doi:10.1039/c8sm01438h), 2018-01-01
Supplement: c8sm01438h1.pdf [file c8sm01438h1.pdf]

# Theory of Polymer-Electrolyte-Composite Electroactuator Sensors with Flat or Volume-Filling Electrodes Supplementary Information

Zachary A. H. Goodwin<sup>1,2</sup> and Alexei A. Kornyshev<sup>2,3,\*</sup>

<sup>1</sup>Department of Physics, CDT Theory and Simulation of Materials, Imperial College  
London, South Kensington Campus, London SW7 2AZ, UK

<sup>2</sup>Department of Chemistry, Imperial College London, South Kensington Campus,  
London SW7 2AZ, UK

<sup>3</sup>Thomas Young Centre for Theory and Simulation of Materials, Imperial College  
London, South Kensington Campus, London SW7 2AZ, UK

\*a.kornyshev@imperial.ac.uk

July 29, 2018

## 1 Short-Circuit: Slit Pore

Here we outline the equations for reverse actuation with slit pores, as depicted in Fig. 2 of the main text. All assumptions from the main text are employed and it is further assumed that there is no variation in the  $z$  coordinate. Hence, the relevant dimensionless Helmholtz equation is as follows

$$\frac{\partial^2 \tilde{\psi}_s(\tilde{x}, \tilde{y})}{\partial \tilde{y}^2} + \frac{\partial^2 \tilde{\psi}_s(\tilde{x}, \tilde{y})}{\partial \tilde{x}^2} = (1 - \gamma) \tilde{\psi}_s(\tilde{x}, \tilde{y}). \quad (\text{S1})$$

Here  $\tilde{y} = \kappa_D y$  is the dimensionless coordinate that describes the distribution normal to the electrodes surface in the slit pore; and  $\tilde{\psi}_s(\tilde{x}, \tilde{y}) = u_s(\tilde{x}, \tilde{y}) - \zeta \mathcal{K} \tilde{x} / \tilde{h}$ .

Again, it is assumed that the partial differential equation is separable ( $\tilde{\psi}_s(\tilde{x}, \tilde{y}) = X_s(\tilde{x})Y_s(\tilde{y})$ ). Since edge effects are ignored, the solution in  $\tilde{x}$  does not differ from the case of porous cylindrical electrodes. Hence, the solution shall not be stated again for brevity (see main text). The differential equation in the  $\tilde{y}$  coordinate is

$$\frac{d^2 Y_s(\tilde{y})}{d\tilde{y}^2} = (1 - \gamma) Y_s(\tilde{y}). \quad (\text{S2})$$

The boundary conditions are as follows  $u_s^{\tilde{y}}(\tilde{x}, 0) = 0$  (superscript  $\tilde{y}$  denotes the derivative with respect to  $\tilde{y}$ ) and  $u_s(\tilde{x}, \tilde{l}/2) = 0$ ,<sup>1</sup> where  $\tilde{l} = l\kappa_D$  with  $l$  corresponding to the width of the split pore, as seen in Fig. 2 of the main text. Thus, the distribution of electrostatic potential, as shown in Fig. S1a) is given by

$$u_s(\tilde{x}, \tilde{y}) = \frac{\zeta \mathcal{K} \tilde{x}}{\tilde{h}} \left[ 1 - \frac{\cosh\{\sqrt{1 - \gamma} \tilde{y}\}}{\cosh\{\sqrt{1 - \gamma} \tilde{l}/2\}} \right]. \quad (\text{S3})$$

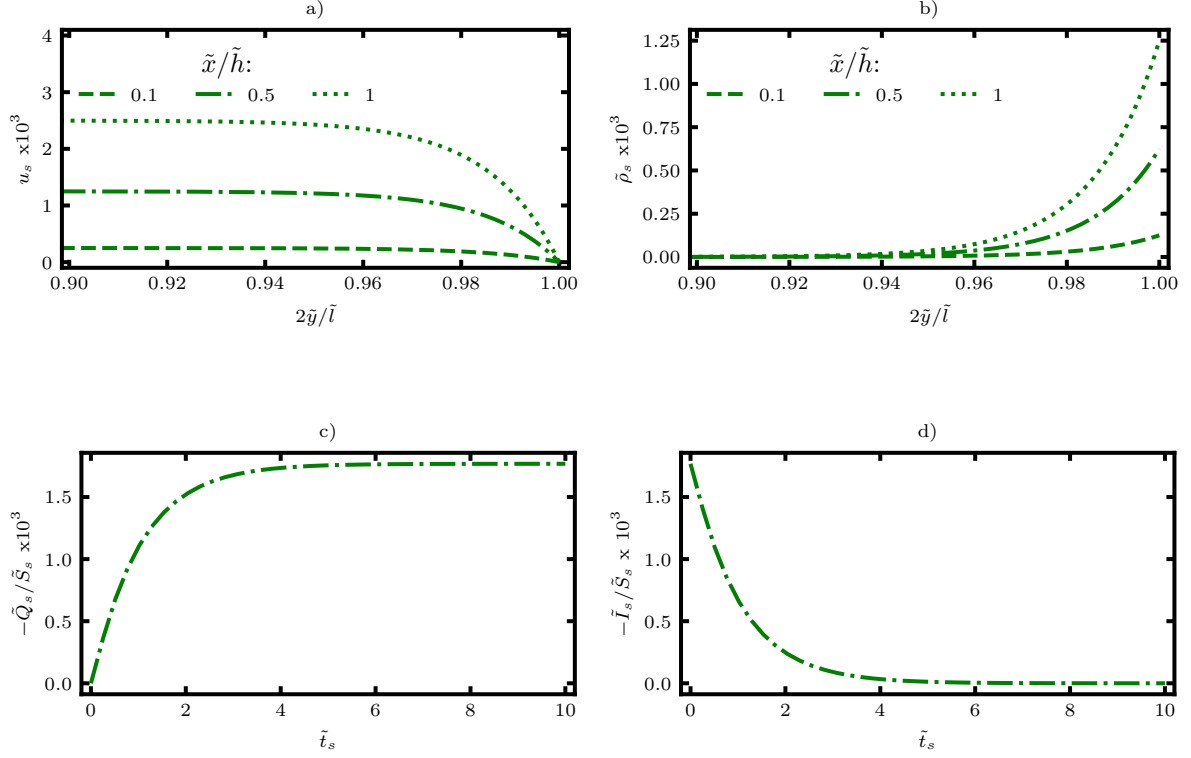

Figure S1: **Short-circuit characteristics for an electroactuator with micro-structured electrodes with slit pores.** The parameters used were  $\mathcal{K} = 5 \times 10^{-3}$ ,  $\tilde{l} = 200$ ,  $\zeta = 0.5$  and  $\gamma = 0.5$ . a) - Dimensionless Electrostatic potential as a function of the normal coordinate to the electrode in the slit pore for the indicated pore depths. b) - Dimensionless excess charge concentration as a function of normal coordinate to the electrode in the pore for the indicated pore depths. c) - Dimensionless charge scaled to the surface area factor as a function of of time in the units of  $\tau_c$ . d) - Dimensionless current scaled to the surface area factor as a function dimensionless time.

From which, at linear response, it is trivial to obtain the corresponding excess charge concentration

$$\tilde{\rho}_s(\tilde{x}, \tilde{y}) = (1 - \gamma) \frac{\zeta \mathcal{K} \tilde{x}}{\tilde{h}} \frac{\cosh\{\sqrt{1 - \gamma} \tilde{y}\}}{\cosh\{\sqrt{1 - \gamma} \tilde{l}/2\}}. \quad (\text{S4})$$

See Fig. S1b) for example curve.

Evaluating the dimensionless surface charge density yields

$$\tilde{\sigma}_s(\tilde{x}) = \sqrt{1 - \gamma} \frac{\zeta \mathcal{K} \tilde{x}}{\tilde{h}} \tanh\{\sqrt{1 - \gamma} \tilde{l}/2\}. \quad (\text{S5})$$

Since the half-thickness is much larger than the Debye length ( $\tilde{l}/2 \gg 1$ ), the dimensionless surface charge density can be simplified to

$$\tilde{\sigma}_s(\tilde{x}) \approx \sqrt{1 - \gamma} \frac{\zeta \mathcal{K} \tilde{x}}{\tilde{h}}, \quad (\text{S6})$$

which does not differ in form from micro-structured electrodes with cylindrical pores.

The total charge accumulated,

$$\tilde{Q}_s = -\sqrt{1-\gamma\zeta\mathcal{K}}\tilde{S}_s \left\{ 1 - \frac{32}{\pi^3} \sum_{n=0}^{\infty} \frac{(-)^n}{(2n+1)^3} \exp \left\{ - (2n+1)^2 \tilde{t}_s \right\} \right\}, \quad (\text{S7})$$

once again, scales with the surface area of the electrodes, where  $\tilde{S}_s = W_0 h L_0 / 4\pi l_B \lambda_D l_u$  and  $\tau_s = 8h^2 C / \pi^2 l \Sigma$ . In Fig. S1c) the equation is plotted for dimensionless charge as a function of time, in units of  $\tau_s$ .

The dimensionless current is given by

$$\tilde{I}_s = -\sqrt{1-\gamma\zeta\mathcal{K}}\tilde{S}_s \left\{ \frac{32}{\pi^3} \sum_{n=0}^{\infty} \frac{(-)^n}{2n+1} \exp \left\{ - (2n+1)^2 \tilde{t}_s \right\} \right\}, \quad (\text{S8})$$

Note that the dimensionless form of the dynamics of charging are identical to that of electrodes with cylindrical pores. In Fig. S1d) the current has been displayed again for completeness.

## References

- [1] K. Farinholt, D. J. Leo, Modeling of electromechanical charge sensing in ionic polymer transducers, *Mechanics of Materials* 36 (2004) 421–433.
